# Supplementary material for: A template-free synthesis of the hierarchical hydroxymethyl PEDOT tube-coral array and its application in dye-sensitized solar cells
Source: Royal Society of Chemistry journal article supplement (doi:10.1039/c5ta06376k), 2015-10-30
Supplement: c5ta06376k1.pdf [file c5ta06376k1.pdf]

## Electronic Supplementary Information

### A Template-free Synthesis for the Hierarchical Hydroxymethyl PEDOT Tube-Coral Array and Its Application in Dye-Sensitized Solar Cells

Yi-Feng Lin,<sup>a</sup> Chun-Ting Li,<sup>b</sup> and Kuo-Chuan Ho<sup>a,b,\*</sup>

<sup>a</sup> *Institute of Polymer Science and Engineering, National Taiwan University, Taipei 10617, Taiwan*

<sup>b</sup> *Department of Chemical Engineering, National Taiwan University, Taipei 10617, Taiwan*

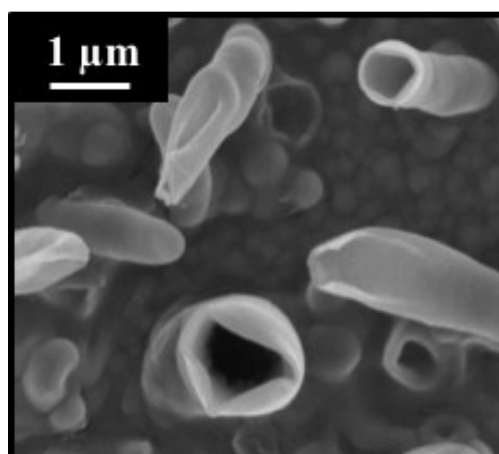

**Fig. S1** FE-SEM images of the PEDOT-MeOH TA\* film obtained from the electro-polymerization bath containing tetramethylammonium perchlorate (TMAP).

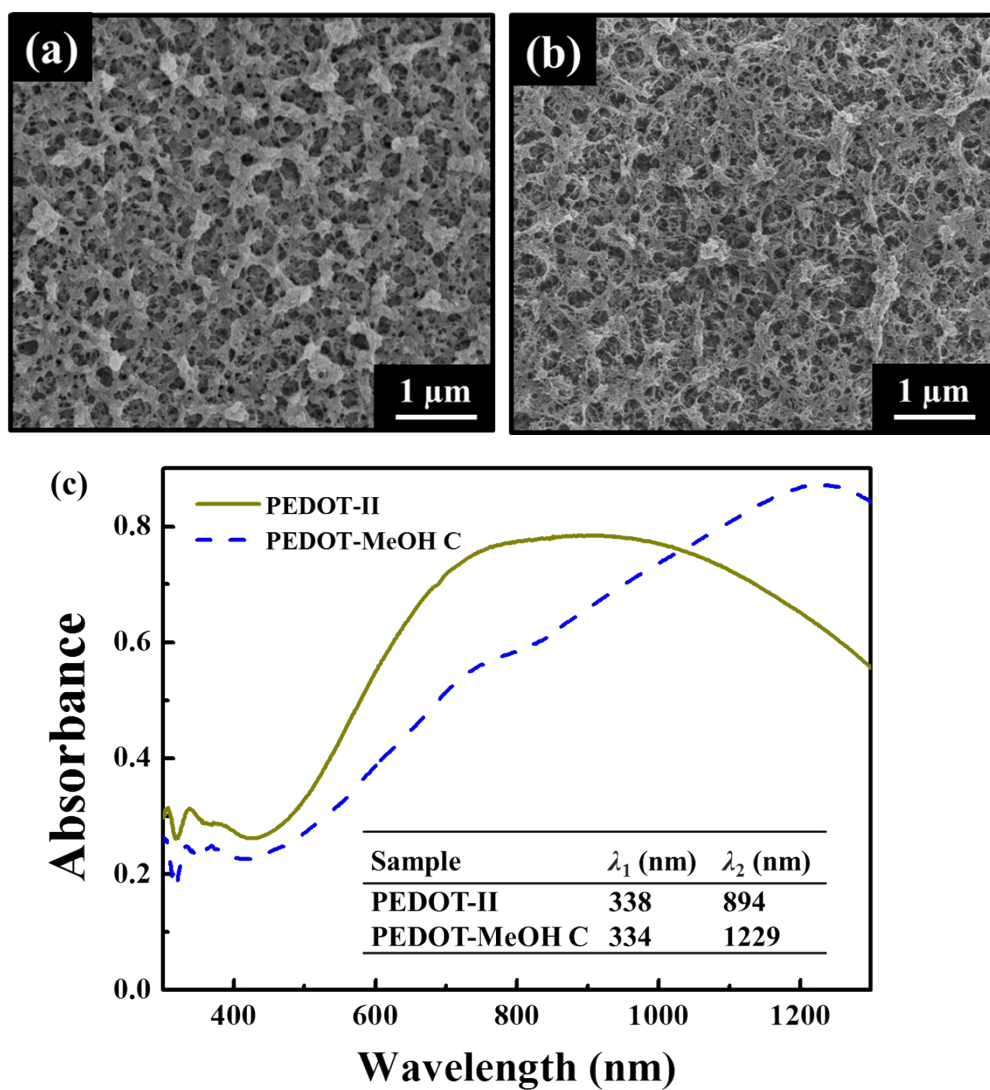

**Fig. S2** FE-SEM images of (a) PEDOT-I and (b) PEDOT-II films.  
(c) Absorption spectra of PEDOT-II and PEDOT-MeOH C films.

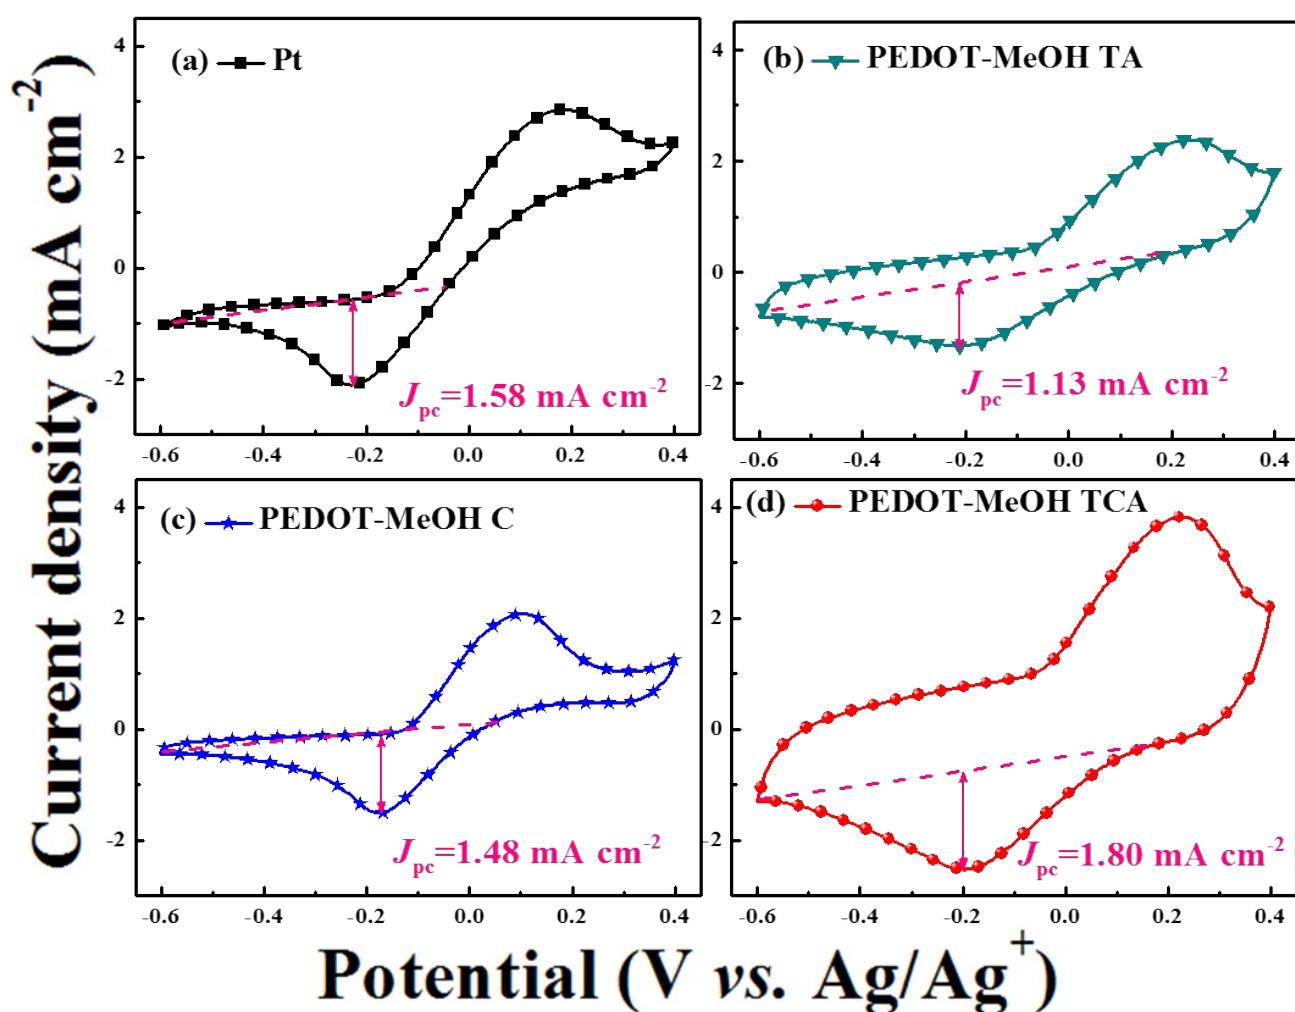

**Fig. S3** Cyclic voltammograms of various films including the background curves. The distance-lines from the cathodic peak to the background curve (namely,  $J_{pc}$ ) are given.

**Table S1** The photovoltaic parameters of this study. The parameters obtained from Tafel plot are based on the symmetric cell of the films, while the parameters obtained from EIS analysis are based on the DSSCs with various CE films. The standard deviation for each Tafel plot is calculated based on the data collected from three symmetric cells.

| Electro-catalytic films on<br>the counter electrode | $J_0$<br>(mA cm <sup>-2</sup> ) | $R_{ct-Tafel}$<br>(Ω cm <sup>2</sup> ) | $R_s^*$<br>(Ω) | $R_{ct1}$<br>(Ω) | $R_{ct2}$<br>(Ω) |
|-----------------------------------------------------|---------------------------------|----------------------------------------|----------------|------------------|------------------|
| Pt                                                  | 4.59 ± 0.09                     | 2.80 ± 0.05                            | 23.53          | 1.78             | 13.53            |
| PEDOT-MeOH TA                                       | 3.99 ± 0.07                     | 3.16 ± 0.06                            | 20.40          | 2.46             | 13.90            |
| PEDOT-MeOH C                                        | 4.39 ± 0.04                     | 2.92 ± 0.02                            | 22.05          | 2.13             | 13.88            |
| PEDOT-MeOH TCA                                      | 4.82 ± 0.03                     | 2.65 ± 0.02                            | 20.09          | 1.51             | 13.60            |

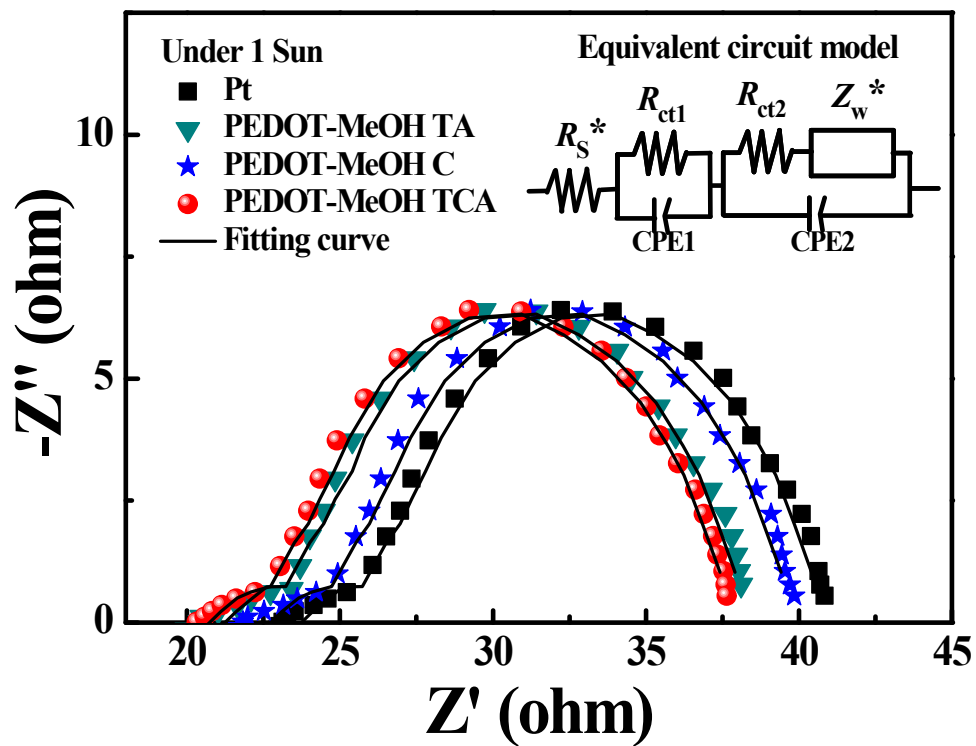

**Fig. S4** Electrochemical impedance spectra of DSSCs with various counter electrodes, measured at  $100 \text{ mW cm}^{-2}$  (AM 1.5G).
